# Supplementary material for: Genetic Variation in Plant CYP51s Confers Resistance against Voriconazole, a Novel Inhibitor of Brassinosteroid-Dependent Sterol Biosynthesis
Source: PubMed Central journal article supplement (PMC3546049; doi:10.1371/journal.pone.0053650), 2013-01-15
Supplement: pone.0053650.s001.pdf [file pone.0053650.s001.pdf]

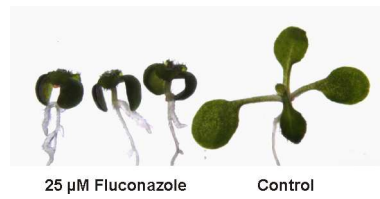

**Figure S1. Fluconazole treatment induces BR-deficient like phenotypes.** Arabidopsis plants were grown for 7 d on ATS plates containing 25  $\mu$ M fluconazole (left) or on unsupplemented plates as controls (right).
