# Supplementary material for: Genetic Variation in Plant CYP51s Confers Resistance against Voriconazole, a Novel Inhibitor of Brassinosteroid-Dependent Sterol Biosynthesis
Source: PubMed Central journal article supplement (PMC3546049; doi:10.1371/journal.pone.0053650), 2013-01-15
Supplement: pone.0053650.s002.pdf [file pone.0053650.s002.pdf]

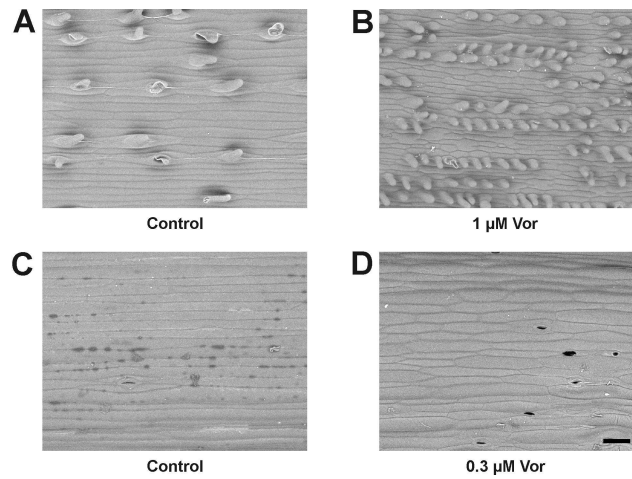

**Figure S2. Voriconazole reduces cell elongation.** Zinnia (A and B) and cress (C and D) plants were grown on control media or on plates supplemented with the indicated concentration of voriconazole for 10 and 5 days, respectively. Pictures of epidermal hypocotyl cells were taken by electron microscopy. The bar represents 50  $\mu\text{m}$ . All pictures were taken with the same magnification.
