# Supplementary material for: Genetic Variation in Plant CYP51s Confers Resistance against Voriconazole, a Novel Inhibitor of Brassinosteroid-Dependent Sterol Biosynthesis
Source: PubMed Central journal article supplement (PMC3546049; doi:10.1371/journal.pone.0053650), 2013-01-15
Supplement: pone.0053650.s004.pdf [file pone.0053650.s004.pdf]

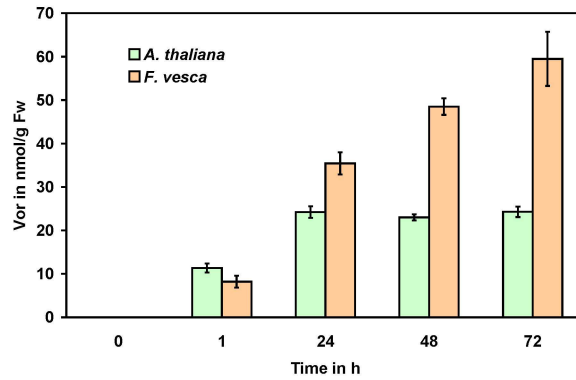

**Figure S4. Uptake of voriconazole by *A. thaliana* and *F. vesca*.** Three-week-old *A. thaliana* and *F. vesca* plants were transferred to liquid ATS media containing 25  $\mu$ M voriconazole and incubated for the indicated time. Subsequently samples were taken and analyzed by HPLC-ESI-MS<sup>2</sup>. The average and standard deviation of three biological replicates is shown.
