# Supplementary material for: Genetic Variation in Plant CYP51s Confers Resistance against Voriconazole, a Novel Inhibitor of Brassinosteroid-Dependent Sterol Biosynthesis
Source: PubMed Central journal article supplement (PMC3546049; doi:10.1371/journal.pone.0053650), 2013-01-15
Supplement: pone.0053650.s006.pdf [file pone.0053650.s006.pdf]

**Table S1: Compounds interfering with sterol and BR biosynthesis**

| Compound                  | Structure    | Evidence [Reference]                                                                                                    | Availability               |
|---------------------------|--------------|-------------------------------------------------------------------------------------------------------------------------|----------------------------|
| Compounds targeting CYP51 | Voriconazol  | Sterol, BR and GA profile, expression of a resistant CYP51 variant, hypocotyl elongation and rescue assays [This study] | Pfizer (Vfend)             |
|                           | LAB 170250F  | Sterol profile, expression of a resistant CYP51 variant [3]                                                             | Not commercially available |
| Compounds targeting DWF4  | Brassinazole | Hypocotyl elongation and rescue assays [1], binding of Brassinazole to DWF4 [2]                                         | TCI (no. B2829)            |
|                           | Brz220       | Hypocotyl elongation and rescue assays [6], binding of Brz220 to DWF4 [8]                                               | Not commercially available |

**Table S1: Compounds interfering with sterol and BR biosynthesis (continuation)**

| Compound      | Structure                                                                           | Evidence [Reference]                                                                                                                                         | Availability                                                                                                 |
|---------------|-------------------------------------------------------------------------------------|--------------------------------------------------------------------------------------------------------------------------------------------------------------|--------------------------------------------------------------------------------------------------------------|
| Brz2001       | 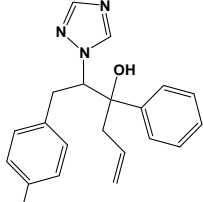   | Hypocotyl elongation and rescue assays with 24-epiBL and GA <sub>3</sub> . The structural similarity to brassinazole suggests DWF4 as a potential target [7] | Not commercially available                                                                                   |
| Propiconazole |    | Hypocotyl elongation and rescue assays with 24-epiBL and GA <sub>3</sub> [6,4]. DWF4 might be the molecular target of propiconazole [4]                      | Santa Cruz Biotchnology (sc-250786)<br>Sigma-Aldrich (no. 45642)<br>Toronto Research Chemicals (no. P770100) |
| Ketoconazole  |    | Hypocotyl elongation and rescue assays with 24-epiBL and GA <sub>3</sub> [5]                                                                                 | Enzo Life Sciences (no. BML-EI107)<br>LKT Laboratories (no. K1676)<br>Sigma-Aldrich (no. 45642)              |
| Itraconazole  |  | Hypocotyl elongation assays [This study]                                                                                                                     | Biovision (no. 1987-50)<br>LKT Laboratories (no. I7870)<br>Sigma-Aldrich (no. I6657)                         |

Compounds with unknown targets

## References

1. Asami T, Min YK, Nagata N, Yamagishi K, Takatsuto S, et al. (2000) Characterization of brassinazole, a triazole-type brassinosteroid biosynthesis inhibitor. *Plant Physiol* 123: 93-100.
2. Asami T, Mizutani M, Fujioka S, Goda H, Min YK, et al. (2001) Selective interaction of triazole derivatives with DWF4, a cytochrome P450 monooxygenase of the brassinosteroid biosynthetic pathway, correlates with brassinosteroid deficiency in planta. *J Biol Chem* 276: 25687-25691.
3. Grausem B, Chaubet N, Gigot C, Loper JC, Benveniste P (1995) Functional expression of *Saccharomyces cerevisiae* CYP51A1 encoding lanosterol-14-demethylase in tobacco results in bypass of endogenous sterol biosynthetic pathway and resistance to an obtusifoliol-14-demethylase herbicide inhibitor. *Plant J* 7: 761-770.
4. Hartwig T, Corvalan C, Best NB, Budka JS, Zhu JY, et al. (2012) Propiconazole is a specific and accessible brassinosteroid (BR) biosynthesis inhibitor for arabidopsis and maize. *PLoS One* 7: e36625.
5. Oh K, Yamada K, Asami T, Yoshizawa Y (2012) Synthesis of novel brassinosteroid biosynthesis inhibitors based on the ketoconazole scaffold. *Bioorg Med Chem Lett* 22: 1625-1628.
6. Sekimata K, Han SY, Yoneyama K, Takeuchi Y, Yoshida S, et al. (2002) A specific and potent inhibitor of brassinosteroid biosynthesis possessing a dioxolane ring. *J Agric Food Chem* 50: 3486-3490.
7. Sekimata K, Kimura T, Kaneko I, Nakano T, Yoneyama K, et al. (2001) A specific brassinosteroid biosynthesis inhibitor, Brz2001: evaluation of its effects on Arabidopsis, cress, tobacco, and rice. *Planta* 213: 716-721.
8. Sekimata K, Ohnishi T, Mizutani M, Todoroki Y, Han SY, et al. (2008) Brz220 interacts with DWF4, a cytochrome P450 monooxygenase in brassinosteroid biosynthesis, and exerts biological activity. *Biosci Biotechnol Biochem* 72: 7-12.
