# Supplementary material for: Genetic Variation in Plant CYP51s Confers Resistance against Voriconazole, a Novel Inhibitor of Brassinosteroid-Dependent Sterol Biosynthesis
Source: PLOS journal article supplement (doi:10.1371/journal.pone.0053650), 2013-01-15
Supplement: S3 (10.1371/journal.pone.0053650.s003) [file journal.pone.0053650.s003]

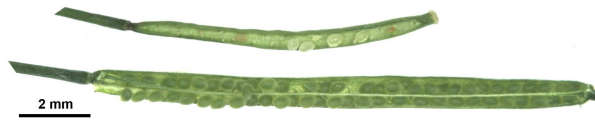

**Figure S3. Voriconazole affects seed development.** Arabidopsis plants were sprayed for 4 weeks with either 10  $\mu$ M Vor (upper silique) or, as a control, with water (lower silique) 5 times a week prior microscopic observation.
